# Supplementary material for: Gold nanoparticle-packed microdisks for multiplex Raman labelling of cells
Source: Royal Society of Chemistry journal article supplement (doi:10.1039/c4nr01851f), 2014-01-01
Supplement: c4nr01851f1.pdf [file c4nr01851f1.pdf]

## Electronic Supplementary Information

### Fabrication of Gold Nanoparticles-Packed Microdisks for Multiplex Raman Labeling of Cells

Peipei Zhang, Junfei Xia, Zhibin Wang, Jingjiao Guan

Department of Chemical and Biomedical Engineering, FAMU-FSU College of Engineering,  
Florida State University, Tallahassee, FL 32310, USA

Integrative NanoScience Institute, Florida State University, Tallahassee, FL 32306, USA

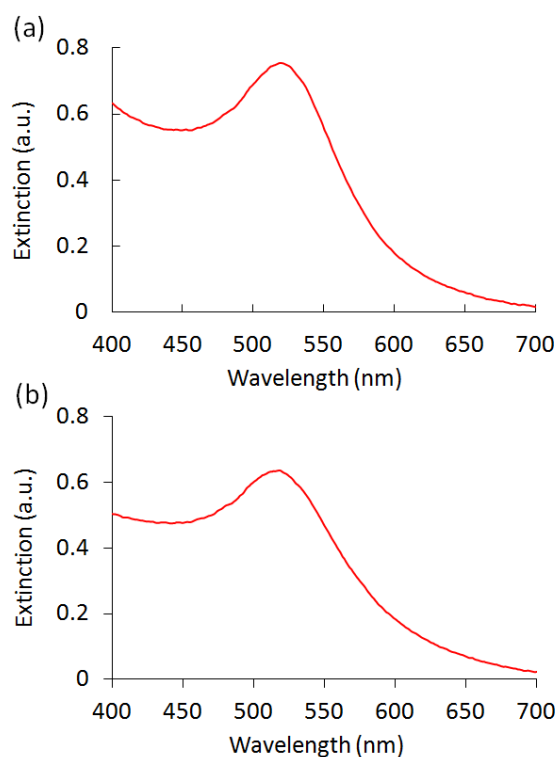

**Figure S1.** UV-Vis extinction spectra of suspensions of (a) commercial and (b) home-made 10 nm-diameter AuNPs used to prepare the microdisks.

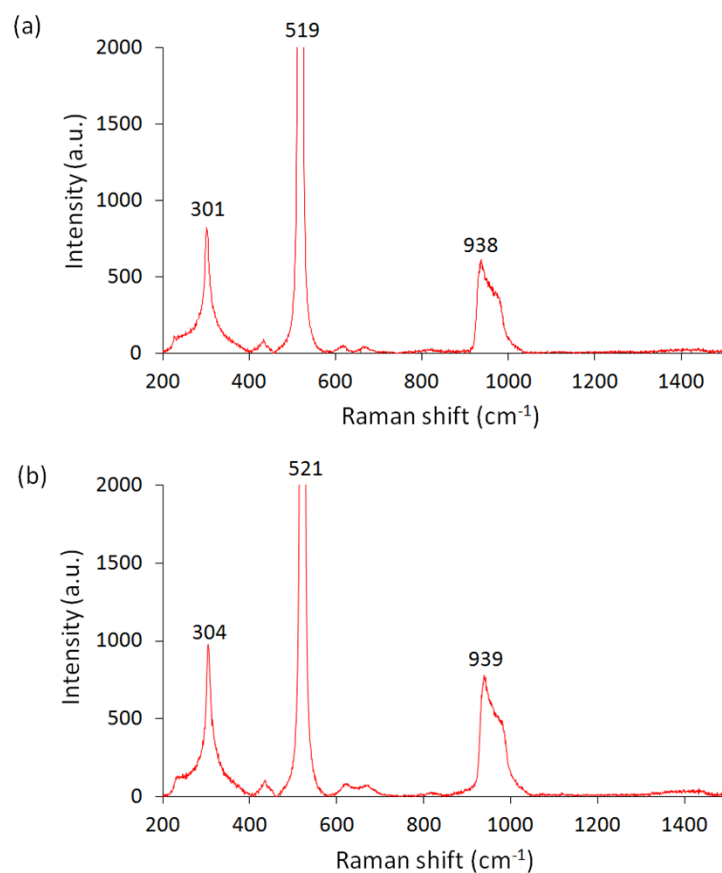

**Figure S2.** (a) Raman spectrum of a PVA-coated silicon wafer. (b) Raman spectrum of microdisks printed on a PVA-coated silicon wafer. Microdisk composition: PAH/(PSS/PDAC)<sub>2</sub>/(AuNPs/PDAC)<sub>3</sub>/PSS/PDAC. The microdisks did not contain any Raman reporter.
